# Supplementary material
Source: PubMed Central journal article supplement (PMC4425222)
Supplement: Supp_Figure2.pdf [file Supp_Figure2.pdf]

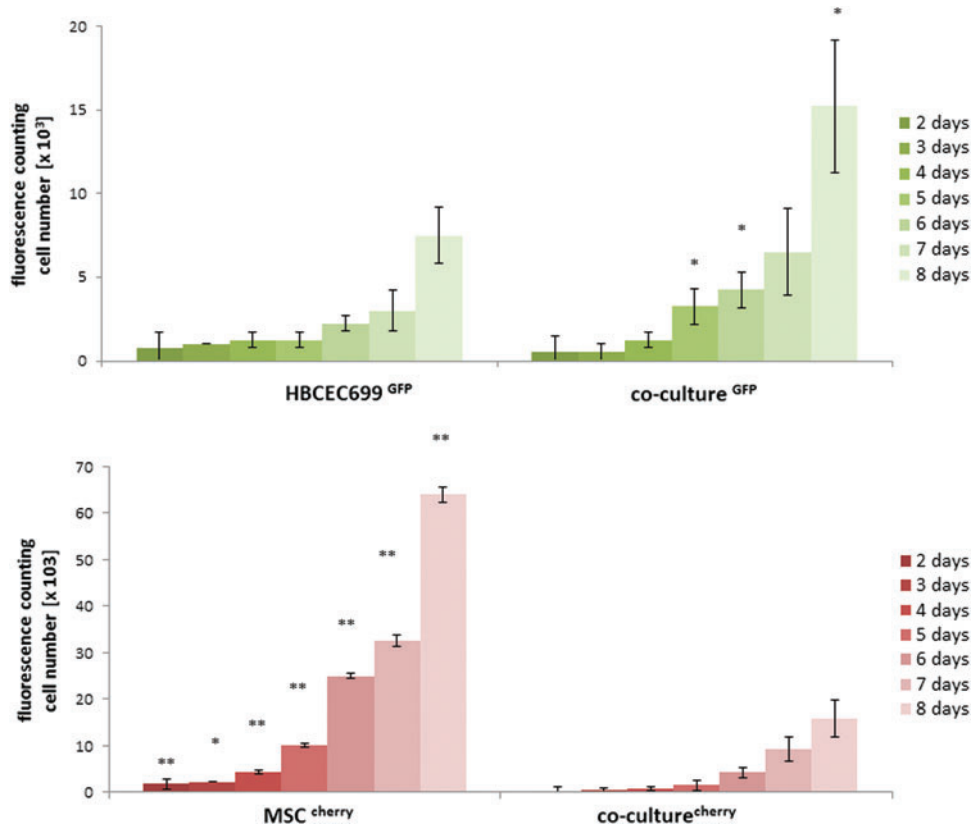

**SUPPLEMENTARY FIG. S2.** MSC<sup>cherry</sup>, HBCEC<sup>GFP</sup> cells, and a co-culture of MSC<sup>cherry</sup>/HBCEC<sup>GFP</sup> cells (ratio 60:40) were cultured in 24-well plates in MSC culture medium till 8 days, respectively, whereby the two different HBCEC<sup>GFP</sup> (*upper panel*) and MSC<sup>cherry</sup> mono-cultures (*lower panel*) contained the same amount of cells as the corresponding co-culture. At the indicated time points, all cells from each culture were trypsinized, and the total amount of cells in each culture was counted by trypan blue exclusion in a hemocytometer using the mcherry and the eGFP filter in a fluorescence microscope. The data represent the mean  $\pm$  SD of four independent experiments. A statistical analysis between the mono-culture and the corresponding population in co-culture was conducted by unpaired Student's *t*-test (\* $P < 0.05$ ; \*\* $P < 0.01$ ). HBCEC, human breast cancer-derived epithelial cells.
