# Supplementary material
Source: PubMed Central journal article supplement (PMC4425222)
Supplement: Supp_Figure3.pdf [file Supp_Figure3.pdf]

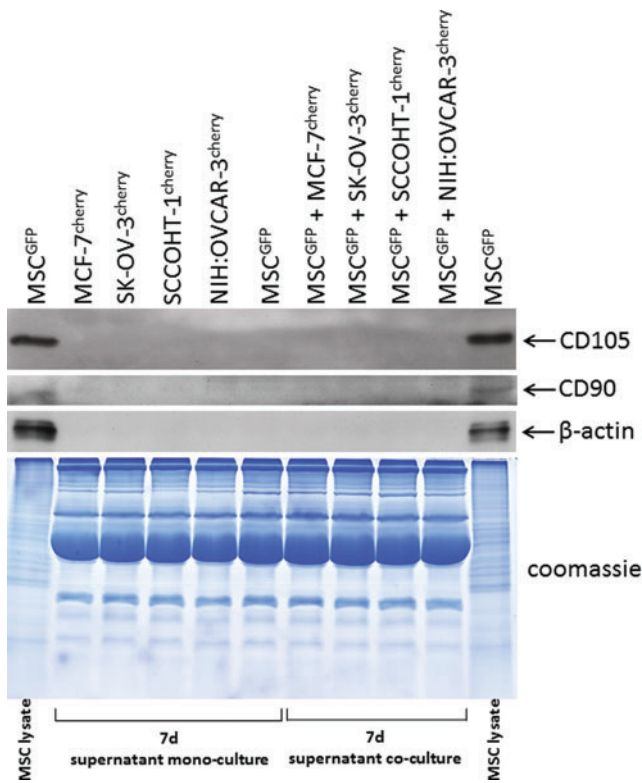

**SUPPLEMENTARY FIG. S3.** Western blot analysis for CD90 and CD105 was performed in aliquots of cell supernatants from a 7 day mono- or co-culture of MSC with the different tumor cell populations. Equal loading of the supernatants was demonstrated by coomassie-staining of the gel. Detection of CD90 and CD105 proteins in cell lysates of MSC served as a control antibody staining, and  $\beta$ -actin served as a loading control. Similar results were obtained in aliquots of 100-fold concentrated supernatants (data not shown).
