# Supplementary material
Source: PubMed Central journal article supplement (PMC4425222)
Supplement: Supp_Figure4.pdf [file Supp_Figure4.pdf]

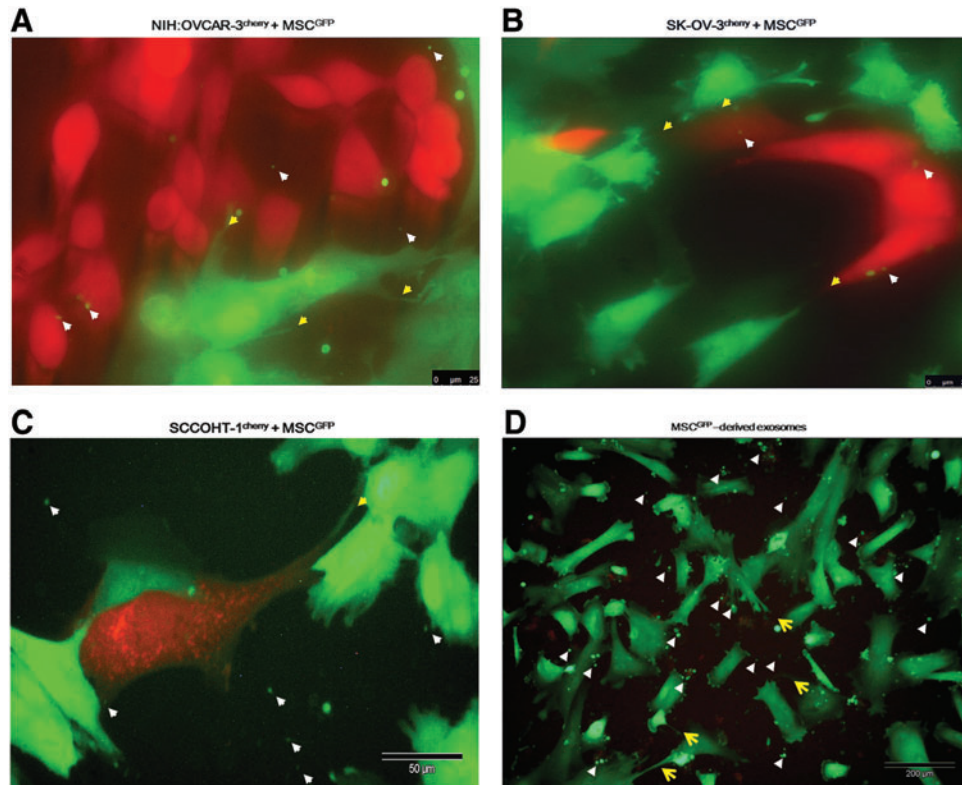

**SUPPLEMENTARY FIG. S4.** Morphology during co-culture of MSC with different cancer cell populations. **(A)** MSC270114<sup>GFP</sup> P3 were co-cultured with NIH:OVCAR-3<sup>cherry</sup>. **(B)** MSC270114<sup>GFP</sup> P3 were co-cultured with SK-OV-3<sup>cherry</sup>, and **(C)** MSC180314<sup>GFP</sup> P5 were co-cultured with SCCOHT-1<sup>cherry</sup> whereby cellular interactions with the extension of nanotubes (*yellow arrows*), formation of exosomes (*white arrows*), and partially overlapping membranes are demonstrated between MSC and corresponding tumor cells. Scale bars represent 25 to 50 μm. **(D)** A 7 days in vitro mono-culture of MSC<sup>GFP</sup> demonstrated cellular interactions with cell-associated and released GFP-labeled exosomes (*white arrowheads*) and some extension of nanotubes (*yellow arrows*) at focal contacts between MSC. Scale bars represent 200 μm.
